# Supplementary material for: Loss of Xist RNA from the inactive X during B cell development is restored in a dynamic YY1-dependent two-step process in activated B cells
Source: PLoS Genet. 2017 Oct 9;13(10):e1007050. doi: 10.1371/journal.pgen.1007050 (PMC5648283; doi:10.1371/journal.pgen.1007050)
Supplement: S2 Table — Each list (upregulated or down-regulated genes) is found in separate tabs. (XLSX) [file pgen.1007050.s013.xlsx]

## Sheet: Upregulated
Gene	Log2 FC (Cre+/Cre-)	FDR
Syn1	1.75504	6.52239e-14
Gpr34	1.5359	2.23914e-10
Plxna3	1.35333	1.82965e-42
Slc7a3	1.3022	1.75548e-09
Cfp	1.25764	5.43191e-29
Cxcr3	1.20051	0.000541008
Gm5385	1.18615	3.64226e-05
Bcorl1	0.951153	1.23056e-14
Gm6982	0.941362	0.000123298
Pgk1	0.841471	3.56885e-17
Gm6447	0.785634	0.00581982
Pcyt1b	0.754137	0.0870771
Rab39b	0.700551	0.0181528
Gm614	0.616349	0.0779227
Apln	0.612617	0.0919317
Itgb1bp2	0.599076	0.0180764
Gm15267	0.584518	0.00127366
Rab9	0.576451	1.91998e-12
Gm14706	0.556256	1.03775e-07
Itm2a	0.553058	1.46747e-05
Syp	0.542478	0.0433095
2010204K13Rik	0.537138	0.00227208
Gm15432	0.53603	0.120956
Slc25a53	0.535815	1.19593e-09
Mcts1	0.513902	2.99128e-12
Fmr1os	0.510409	0.143402
Eda	0.50479	0.144275
Gm16373	0.501748	1.66954e-05
A230072C01Rik	0.482154	0.0210036
Nsdhl	0.481142	8.5201e-07
Gm1866	0.453414	0.000409347
Gm6023	0.444288	0.147071
Gm8036	0.441649	0.216045
Tmsb15b1	0.440075	0.248551
Tlr7	0.420415	6.06387e-12
Gm5380	0.420223	5.74593e-06
Gm14539	0.401348	2.26073e-11
Gm14538	0.396862	0.0210226
Hcfc1	0.394705	2.49928e-11
Pja1	0.391969	2.62171e-09
Timm8a1	0.390739	0.0027224
Gm14450	0.388251	0.328743
G6pdx	0.382714	5.67041e-08
Flna	0.381677	8.34212e-11
5530601H04Rik	0.379536	2.13824e-05
Gm16465	0.361606	0.00098314
Tmem29	0.359207	0.000118669
Gm7429	0.358712	0.408079
Mospd2	0.358215	5.13454e-05
Ftsj1	0.356932	8.98703e-05
Gla	0.355161	0.000724837
Gm14780	0.349956	0.258021
Gm14513	0.345034	0.000156631
C1galt1c1	0.344348	0.000933452
Las1l	0.336197	1.37441e-08
Gm14753	0.334806	0.0444926
Gm14830	0.334708	0.000115668
Mdrl	0.334396	0.153484
Gm5637	0.323456	8.28898e-08
Rpl36a	0.322736	0.000459063
Gm14681	0.320307	1.50714e-06
BC022960	0.314999	0.213283
Gm4987	0.309603	0.0556548
5730416F02Rik	0.305913	0.291819
Apex2	0.291082	0.00125052
Nap1l3	0.290818	0.338843
Gm14567	0.288685	0.00250555
Hdac8	0.288643	0.010729
Kcnd1	0.286573	0.0334903
Drp2	0.284813	0.169333
Gm15238	0.282087	0.531536
Pbdc1	0.279973	2.93139e-06
Morf4l2	0.270835	5.0793e-06
Gm9430	0.266511	0.0142158
Cask	0.262275	0.135418
Gm8522	0.259675	0.120949
Llph-ps2	0.253819	0.0270423
Suv39h1	0.250983	1.59423e-05
Ammecr1	0.249705	0.00138808
Maged2	0.247602	0.363011
Gm14767	0.243804	0.374926
Fam120c	0.243536	0.0281906
Gm7108	0.240183	0.163994
Gm15190	0.236949	0.0346731
1110012L19Rik	0.234763	0.0512006
L1cam	0.230216	0.456581
Rpl3-ps1	0.223945	0.00034999
Cenpi	0.217273	0.0133263
Gm5124	0.212203	0.401354
Gm44592	0.20964	0.513876
Gm5391	0.209508	0.00369763
Uba1	0.209434	0.00142964
Prdx4	0.206548	0.0260382
Zc4h2	0.205705	0.157013
Acot9	0.190748	0.0421486
Phf6	0.189502	0.00350863
Ebp	0.185286	0.0331325
Gm8722	0.183081	0.0555365
Gm15236	0.181512	0.413607
Amer1	0.178909	0.0672627
Mid1ip1	0.178359	0.0389673
Prkaca-ps1	0.167389	0.494422
Gm8692	0.165353	0.0699653
Gm5761	0.16388	0.554178
Gm8822	0.162337	0.00592524
Cmc4	0.162305	0.309585
Msl3	0.159661	0.0116137
Pfkfb1	0.157806	0.380599
Rbm3	0.156367	0.0461868
Zxdb	0.154644	0.27985
Elk1	0.151028	0.0701173
Hccs	0.148536	0.0331244
Zcchc18	0.144599	0.301337
Ndufa1	0.143187	0.113628
Bcap31	0.140174	0.0305447
Cox7b	0.138873	0.028131
Tsc22d3	0.137845	0.300203
Gm6275	0.137544	0.177455
Fancb	0.136038	0.247181
Gm8844	0.134382	0.335572
4933407K13Rik	0.130366	0.429268
Gm6382	0.129477	0.0571324
Nkrf	0.129414	0.0865631
Gm14586	0.129057	0.090665
Pdha1	0.128103	0.0591159
Prps1	0.127268	0.0461556
Eif2s3x	0.125156	0.256127
Cetn2	0.118797	0.179169
Txlng	0.118141	0.218059
Acsl4	0.118039	0.179152
Gm6829	0.117019	0.461862
Gm5931	0.115513	0.342624
Rpl39	0.113744	0.128162
Was	0.112774	0.0870931
Enox2	0.11001	0.306987
Rbmx2	0.10776	0.241785
Slc25a5	0.104699	0.082651
Gm1862	0.104015	0.239939
Tmsb4x	0.104014	0.16539
Dock11	0.103652	0.242874
Emd	0.101382	0.114869
Wbp5	0.100776	0.287875
Rpl22-ps1	0.100219	0.190925
Cdk16	0.0995369	0.313457
Ap3s1-ps1	0.0980072	0.730317
3830403N18Rik	0.0948893	0.838924
Gm16421	0.0937545	0.641985
Rps4x	0.0893959	0.200315
Nono	0.0871622	0.172496
Gm6274	0.0870392	0.559799
2810403D21Rik	0.0865978	0.711477
Gm7331	0.0837377	0.834262
Rragb	0.0831911	0.563674
Gm15148	0.0811977	0.464834
Cxx1b	0.0811794	0.759674
Brwd3	0.0778956	0.477697
Gm8806	0.0776749	0.265773
Taf1	0.0738286	0.358786
Gm9434	0.0712581	0.640441
Tmem185a	0.0711468	0.47866
Rbbp7	0.0701058	0.268519
Uxt	0.0698171	0.673425
Kdm5c	0.0677182	0.30626
Slc25a14	0.065486	0.718612
P2ry10	0.0652768	0.518529
Gm14845	0.0648931	0.756477
Maoa	0.0601015	0.768512
Gm7327	0.0600274	0.510489
Wdr45	0.0599527	0.687541
Aifm1	0.0596085	0.440899
Gm6472	0.0594476	0.715766
Il2rg	0.058124	0.513491
Sms	0.0555022	0.477182
Fmr1	0.0553738	0.605292
Zfp182	0.0546784	0.668667
Dkc1	0.0541988	0.505032
Gm6368	0.0541966	0.476805
Siah1b	0.0540529	0.617892
Ikbkg	0.0535734	0.498256
Prps2	0.0521528	0.487855
Cxx1a	0.0518735	0.912173
Tbc1d25	0.0480757	0.698059
Gm14769	0.0479507	0.877414
Rbm41	0.0453606	0.708739
Hmgn5	0.0432037	0.678931
Xk	0.0426324	0.778217
Zdhhc9	0.042537	0.643632
Gm9109	0.0356457	0.93096
Smt3h1-ps	0.0341396	0.876749
Gm8577	0.0337821	0.934066
Ribc1	0.0323905	0.945845
Gm1947	0.0323775	0.950855
Gm14870	0.0319816	0.934942
Tmem164	0.0313962	0.743655
Utp14a	0.0284827	0.704357
Idh3g	0.0283268	0.706578
Brcc3	0.0282017	0.792654
Gm1848	0.0246396	0.79294
Vcp-rs	0.0242806	0.743655
Gm21986	0.0208163	1
Phka2	0.0198937	0.871569
Ercc6l	0.0186944	0.841067
Mpp1	0.0185278	0.873119
Ofd1	0.0165809	0.885919
Gm8876	0.0162343	0.975169
Plp2	0.0151698	0.887522
Gm7823	0.0146229	0.940753
Mdm4-ps	0.0114031	0.9841
Tsr2	0.00874682	0.935435
AA414768	0.00862256	1
Zbtb33	0.00791159	0.957593

## Sheet: Downregulated
Gene	Log2 FC (Cre+/Cre-)	FDR
Taf9b	-3.50543	4.06887e-154
Hmgb3	-1.95091	9.12137e-52
Chic1	-1.69871	5.24313e-13
Armcx4	-1.65028	7.86522e-14
Iqsec2	-1.62675	2.01805e-61
Pdzd4	-1.62558	7.82318e-15
Gm38020	-1.51677	7.07138e-14
Hsd17b10	-1.35067	1.34773e-66
Usp11	-1.32359	3.22514e-57
Fgf13	-1.30445	7.45127e-07
Gm5763	-1.21112	6.78179e-12
Arhgap6	-1.19484	1.72433e-08
Armcx6	-1.1881	5.32345e-06
Xist	-1.17036	2.21369e-41
Pnma5	-1.15184	0.124584
Gm5946	-1.1239	8.59536e-22
Stard8	-1.10838	0.00482364
Tspan6	-1.03961	0.00112614
Jpx	-1.02301	2.16028e-09
Col4a5	-1.00457	0.00290074
Gm15163	-0.961811	6.93977e-15
Armcx2	-0.94587	7.25673e-14
Bhlhb9	-0.93499	3.12577e-21
Renbp	-0.872185	1.14632e-26
Rbmx	-0.840166	2.62239e-47
Wdr13	-0.831411	8.25245e-19
Mtmr1	-0.77395	3.43166e-26
F8a	-0.773754	8.23843e-08
Phka1	-0.752393	8.58499e-08
Ctps2	-0.751497	7.07395e-14
Fam122b	-0.743835	3.67215e-15
Xkrx	-0.736693	1.22608e-06
Rpgr	-0.723438	9.88504e-06
Kantr	-0.71739	0.00453989
Ftx	-0.701088	1.03447e-17
Ddx26b	-0.687806	3.47212e-13
H3f3a-ps1	-0.685837	0.00758214
Gnl3l	-0.659218	1.35725e-20
Prickle3	-0.65261	2.17289e-08
Dmd	-0.634545	1.00115e-05
Rgag4	-0.619536	0.0560806
Haus7	-0.61908	2.32959e-10
Gm6977	-0.618494	7.49271e-05
Rbm3os	-0.609347	0.0724697
Arhgap4	-0.595607	2.68732e-17
Gm5644	-0.588003	4.73155e-13
Fundc2	-0.579682	1.94259e-20
Zfp300	-0.578904	0.0416549
Ubqln2	-0.57513	2.69126e-18
Gm6377	-0.567844	1.22117e-07
A630033H20Rik	-0.561993	0.000672912
Gm9115	-0.561426	0.0727847
Atp7a	-0.548726	2.83758e-06
2210013O21Rik	-0.544548	0.0270118
Gm9200	-0.543828	0.00455199
Gm14608	-0.539444	0.0649544
Rlim	-0.537977	1.97386e-15
Cd99l2	-0.535366	0.000168926
Wdr44	-0.530443	4.96212e-08
Mtm1	-0.530032	1.77684e-05
Ccdc120	-0.52608	0.0585638
Xlr4a	-0.509454	0.0230799
Prkx	-0.505539	3.2921e-11
Gm14639	-0.495752	0.000210519
Gpm6b	-0.490338	0.132075
Armcx3	-0.490327	0.0108774
Amot	-0.48577	0.112964
Gm9157	-0.484087	0.343392
Dnase1l1	-0.47548	0.00162675
Srpk3	-0.471131	2.53824e-07
Rpl7l1-ps1	-0.461934	0.0895737
Tceanc	-0.456738	5.18856e-05
Rps6ka3	-0.455339	3.85766e-10
Gpr174	-0.452232	1.93345e-11
Ogt	-0.449121	1.66585e-12
Gm14719	-0.441092	0.00916737
Cdkl5	-0.43474	1.10338e-05
Sh3kbp1	-0.429821	1.60352e-13
Usp9x	-0.428525	1.60752e-08
Magee2	-0.424856	0.336673
Plp1	-0.424753	0.00560098
Mmgt1	-0.421971	4.33298e-10
Gm14699	-0.421837	0.395732
Ppp1r3f	-0.418736	0.342374
Atrx	-0.417615	3.92669e-07
Rpl19-ps12	-0.41174	0.267802
Mecp2	-0.409839	9.57664e-10
Eif1ax	-0.407944	2.42711e-10
Ndufb11	-0.405235	7.60978e-11
Rnf113a1	-0.400135	0.0021399
Sh3bgrl	-0.399746	5.60923e-05
Slc10a3	-0.393408	1.11488e-06
Xlr4b	-0.390166	0.0382728
Atp6ap1	-0.376526	9.85474e-09
Zmat1	-0.370336	0.00141197
Hdac6	-0.363187	0.000154736
Tbc1d8b	-0.362854	0.00398014
Maged1	-0.356745	0.0949777
Diaph2	-0.352595	8.64286e-05
Arhgef6	-0.347495	3.50636e-09
5430427O19Rik	-0.341566	0.000187106
Zfp275	-0.336648	1.3802e-08
Kdm6a	-0.336029	2.91485e-07
Trappc2	-0.327314	0.0767153
Gdi1	-0.31555	3.81762e-06
Lamp2	-0.313974	8.00045e-06
Firre	-0.310218	0.0485553
Pgrmc1	-0.310129	1.91012e-07
Chst7	-0.308113	0.24805
Snx12	-0.306442	1.70911e-06
Huwe1	-0.297056	1.38965e-07
Pim2	-0.295068	4.61465e-05
Akap17b	-0.293661	0.0651204
Clcn5	-0.293374	0.000676555
Med12	-0.291932	1.21935e-06
3110067C02Rik	-0.29121	0.450156
Stag2	-0.290364	0.000164651
Abcb7	-0.286704	0.000548906
Zmym3	-0.278853	4.59416e-05
C330007P06Rik	-0.275677	0.000334083
Mospd1	-0.274832	0.0556116
Klf8	-0.27319	0.0727213
Phf8	-0.272643	4.11589e-05
Slc9a6	-0.272404	0.00423225
Map3k15	-0.272274	0.32433
Trmt2b	-0.27003	0.00057717
Htatsf1	-0.269692	0.000117124
Araf	-0.267557	1.98121e-05
Abcd1	-0.267077	0.000147645
Slc9a7	-0.266518	0.00461924
A230072E10Rik	-0.266272	0.481881
Irak1	-0.265636	3.61074e-05
Gm14897	-0.260357	0.272423
Bcor	-0.260295	9.47565e-06
Gm6743	-0.253435	0.33173
Atp6ap2	-0.253325	0.00217685
Cybb	-0.250703	0.00263581
Gab3	-0.247859	0.368367
Jade3	-0.241597	0.000823146
Gm15204	-0.236965	0.342781
Klhl15	-0.236562	0.0255011
Ids	-0.234491	0.00528556
Psmd10	-0.231275	0.00385407
F8	-0.22566	0.335739
Nkap	-0.224916	0.00697169
Elf4	-0.222307	0.000410736
Fundc1	-0.218496	0.0229402
Praf2	-0.214119	0.0832733
Gpkow	-0.211981	0.00722843
Magt1	-0.204316	0.00139002
Alg13	-0.202488	0.0244832
Xiap	-0.19849	0.0178168
Gm14857	-0.198475	0.0193938
Gm4784	-0.198329	0.0128099
Sat1	-0.195929	0.0142853
Zfp280c	-0.195003	0.0276545
Slc25a43	-0.192098	0.702295
Lage3	-0.18988	0.0224683
Msn	-0.188817	0.00123315
2610002M06Rik	-0.18648	0.0762581
Syap1	-0.185767	0.0501962
A830080D01Rik	-0.182846	0.0245156
Magee1	-0.180535	0.151939
Fam3a	-0.175115	0.146173
Ap1s2	-0.172604	0.142058
Mbnl3	-0.170072	0.0611395
Gm8545	-0.166452	0.156448
Yipf6	-0.166205	0.093383
Armcx5	-0.160021	0.119625
Gm4992	-0.15841	0.446941
Upf3b	-0.156524	0.0513866
Ddx3x	-0.154104	0.0203171
Fam199x	-0.153163	0.167884
RP23-330G24.3	-0.152743	0.445561
Spin2c	-0.152314	0.626402
Rpl10	-0.149016	0.0384921
Fam50a	-0.147193	0.131152
Gm14698	-0.144812	0.250092
Sash3	-0.144229	0.0335013
Ssr4	-0.143643	0.0590591
Zrsr2	-0.14327	0.047614
Timm17b	-0.140722	0.0724935
Dlg3	-0.138916	0.395264
Tfe3	-0.137945	0.0350759
Piga	-0.137843	0.123734
Pls3	-0.137796	0.743152
Gm14794	-0.137722	0.665087
Uprt	-0.13654	0.20287
Vbp1	-0.12923	0.1315
5730405O15Rik	-0.127579	0.808232
Igbp1	-0.127216	0.0570029
Ngfrap1	-0.125325	0.211554
Ocrl	-0.122691	0.36135
Atp11c	-0.122071	0.185984
Gm8261	-0.117553	0.339343
Rbm10	-0.117328	0.0772517
Pola1	-0.116916	0.178493
Zfx	-0.11109	0.185604
Pdzd11	-0.108341	0.236433
Tbl1x	-0.1049	0.11888
Btk	-0.103788	0.136637
Med14	-0.100311	0.22264
Vma21	-0.100179	0.235506
Snora69	-0.0980559	0.848271
Tab3	-0.0955981	0.261551
Pqbp1	-0.0944774	0.171672
Gm8737	-0.0922751	0.772552
Cul4b	-0.0920412	0.241525
Gk	-0.0890037	0.401003
Otud5	-0.086756	0.247206
Nxt2	-0.0861749	0.588761
Hprt	-0.0859656	0.265415
Stk26	-0.0857524	0.371775
Mbtps2	-0.0835328	0.332513
Gm15186	-0.0832685	0.732401
Efnb1	-0.0812832	0.746084
Dynlt3	-0.0812238	0.430531
Slc35a2	-0.0770404	0.429893
Gripap1	-0.0767113	0.271247
2017-09-06	-0.0730324	0.291462
Apool	-0.0723555	0.531461
Gm6088	-0.0716718	0.697194
Ube2a	-0.0709687	0.297219
Gm6206	-0.0689837	0.420135
Gm15361	-0.0642934	0.573757
Thoc2	-0.0642526	0.522703
Gm5939	-0.0617762	0.475765
Kif4	-0.061584	0.402226
Gm6451	-0.0605285	0.883415
Chm	-0.0585023	0.556542
Atg4a	-0.0582008	0.728007
Mageh1	-0.0581145	0.85911
Gm14928	-0.0581085	0.860915
Gm6039	-0.0563782	0.67682
Foxo4	-0.0533362	0.635185
Smc1a	-0.0520302	0.433867
Taz	-0.0518128	0.525093
Ccdc22	-0.050614	0.82281
Tspyl2	-0.0496383	0.62924
Bex1	-0.0494718	1
Gm8666	-0.0488458	0.867743
Rps24-ps3	-0.0471252	0.659761
Gm2223	-0.0459835	0.528674
BC065397	-0.0436595	0.854043
Hnrnph2	-0.0431426	0.556718
Mid1	-0.0414643	0.968764
Gm5648	-0.041075	0.602552
Rp2	-0.0384934	0.703277
Mtcp1	-0.0383001	0.771776
Gemin8	-0.0335156	0.894332
Naa10	-0.0311546	0.679828
Cstf2	-0.0300854	0.70915
Gm14680	-0.029533	0.714625
F9	-0.029056	0.906255
Rap2c	-0.028718	0.770107
Gprasp1	-0.0283285	0.803193
Pdk3	-0.0235614	0.778331
1810030O07Rik	-0.0203436	0.805982
Gm14373	-0.0192555	0.854043
Gm15232	-0.0189802	0.948239
Usp27x	-0.0149734	0.966447
Gm14584	-0.0117989	0.948685
Gm7117	-0.0115381	1
Ubl4a	-0.00985868	0.916416
Gm5402	-0.00555853	1
Gm9432	-0.00321451	0.988913
